# Supplementary material for: Sorafenib-resistant hepatocellular carcinoma stratified by phosphorylated ERK activates PD-1 immune checkpoint
Source: PubMed Central journal article supplement (PMC5173058; doi:10.18632/oncotarget.8978), 2016-04-25
Supplement: oncotarget-07-41274-s001.pdf [file oncotarget-07-41274-s001.pdf]

SUPPLEMENTARY FIGURES AND TABLES

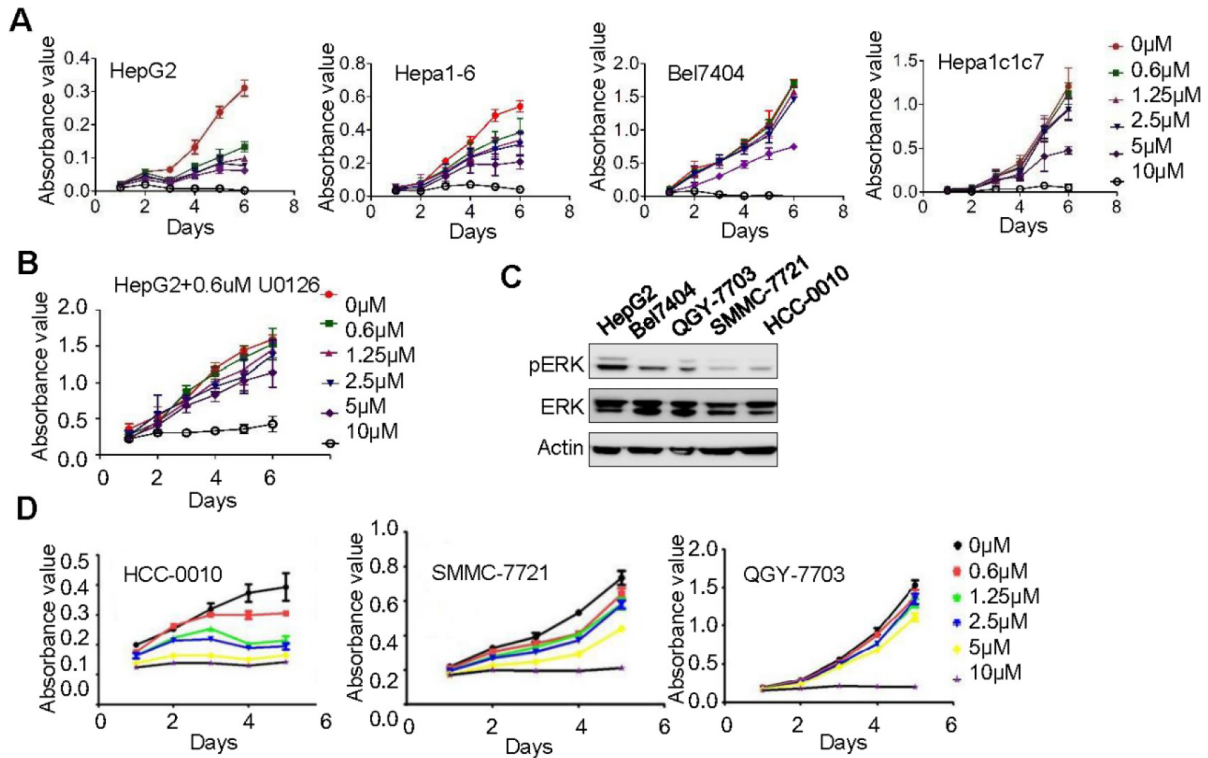

**Supplementary Figure S1: Survival of liver cancer cell lines treated with sorafenib.** CCK-8 cell viability assays of five human and two mouse **A** and **D**. liver cancer cell lines treated with sorafenib at indicated concentrations for up to 6 days. **B**. CCK-8 cell viability assays of HepG2 cells treated with sorafenib at indicated concentrations for 6 days, after incubation with 0.6μM U0126 for 6 hour. **C**. Western blot for pERK and total ERK using whole cell lysates from 5 liver cancer cell lines as indicated.

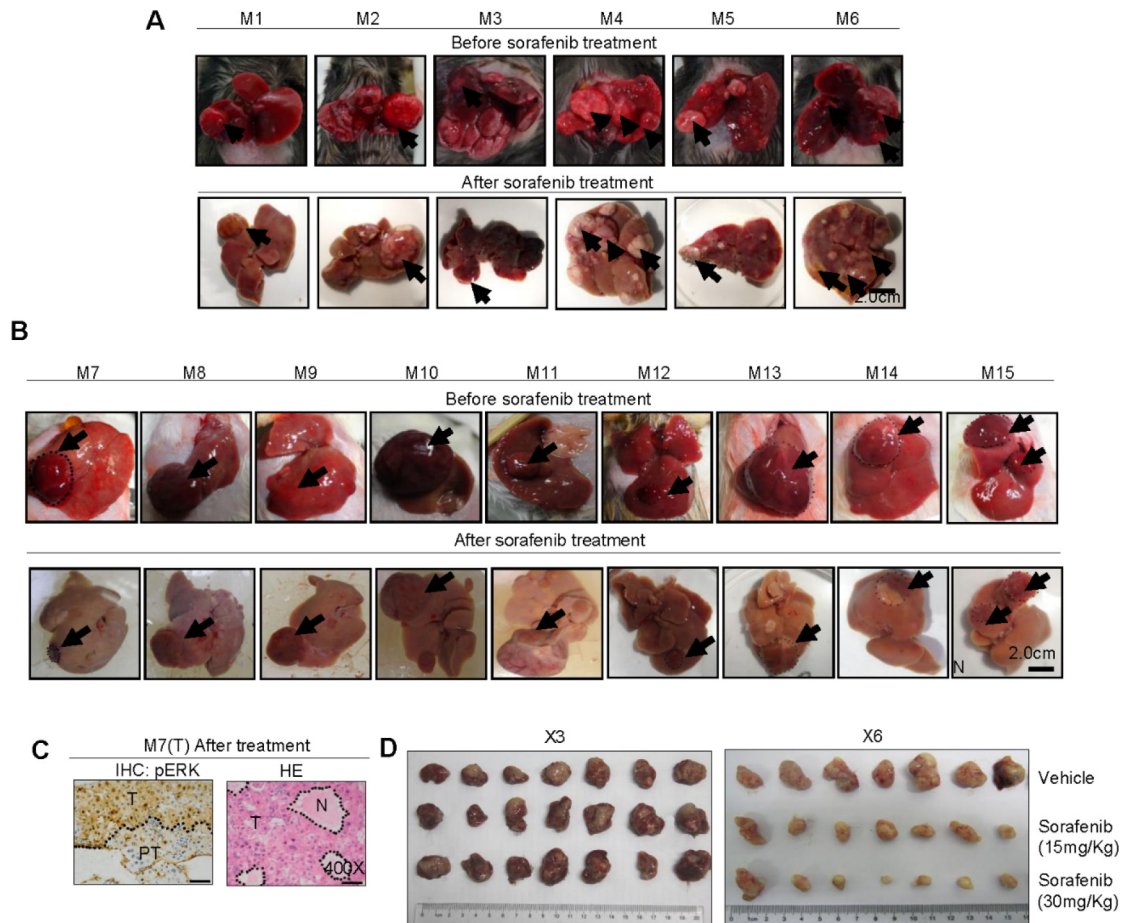

**Supplementary Figure S2: Sorafenib response in mouse hepatoma models.** **A.** Photographs of 6 DEN-induced mouse liver tumors exposed by median laparotomy before (upper) and after (bottom) 3 weeks of daily sorafenib treatment. Arrows indicate the same tumor nodules prior to and after the treatment. **B.** Photographs of 9 aged *DDB1<sup>F/F</sup>; Alb-Cre<sup>+/-</sup>* livers before (upper) and after (bottom) sorafenib treatment, as performed in (A). **C.** Representative IHC for pERK in M7 tumor region showing strong pERK staining in the remnant tumor tissue. N, necrosis; T, tumor; PT, peritumor. **D.** Photographs of xenograft tumors dissected from pERK<sup>-</sup> X3 and pERK<sup>+</sup> X6 PDX models at the end of the treatment with vehicle, 15 mg/kg or 30 mg/kg sorafenib.

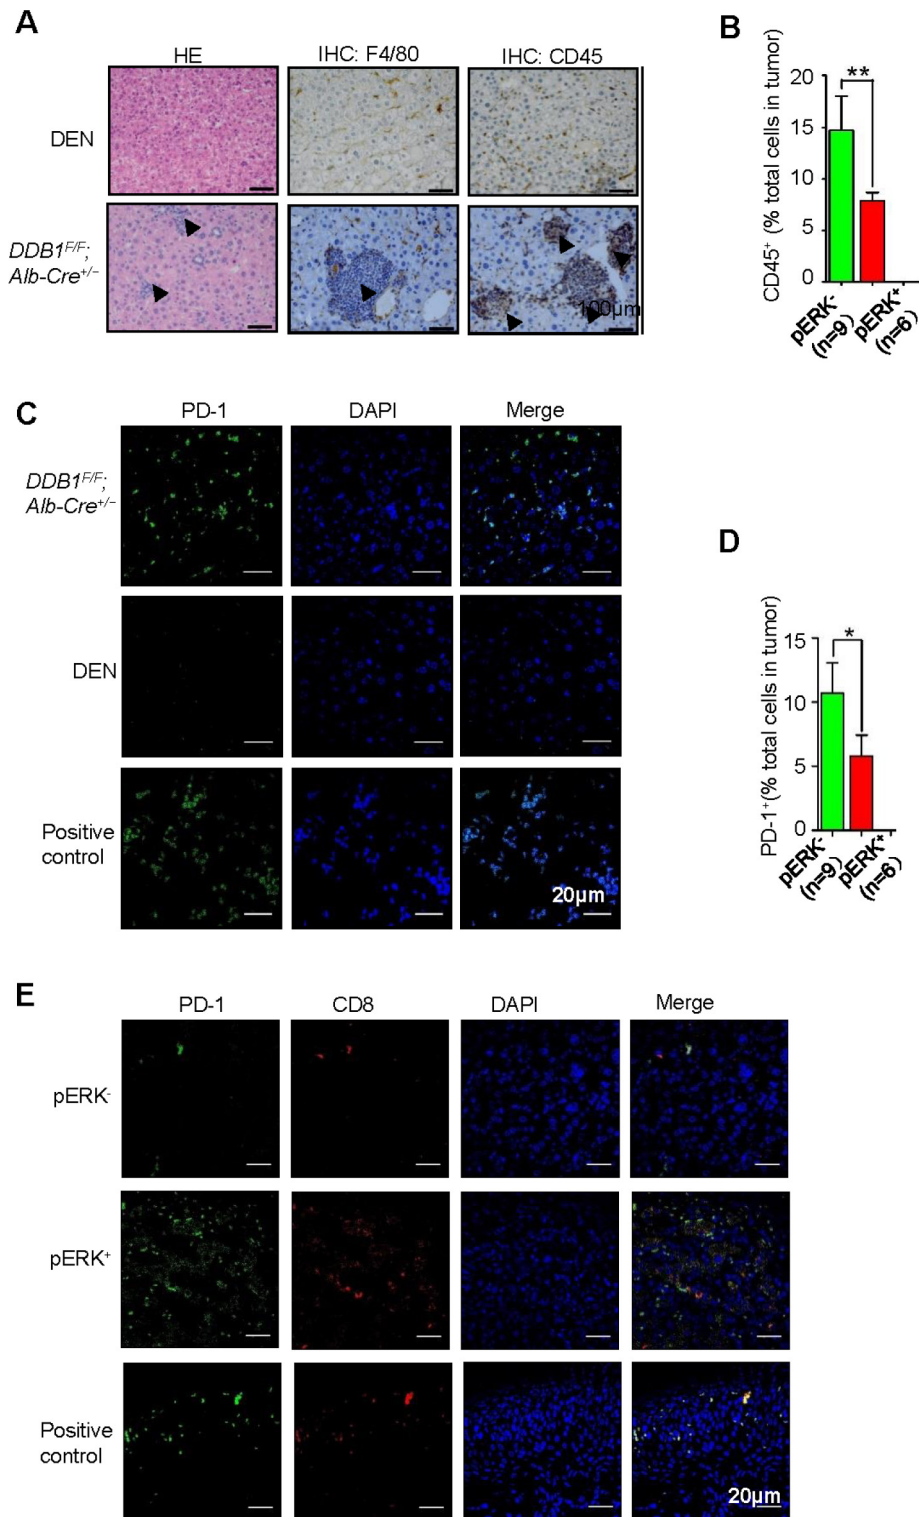

**Supplementary Figure S3: Increased inflammation and intratumoral PD-1<sup>+</sup>CD8<sup>+</sup> T lymphocytes in pERK<sup>-</sup> HCC samples and mouse liver tumor models.** **A.** Representative IHC for CD45 and F4/80 in pERK<sup>+</sup> and pERK<sup>-</sup> mouse liver tumor models. Arrowheads indicate inflammatory clusters. **B.** Quantification of CD45<sup>+</sup> cells in DEN-induced mouse (n=6) and *DDB1<sup>FF</sup>; Alb-Cre<sup>+/-</sup>* mouse (n=9) liver tumor models. **C.** Representative IF staining for PD-1 in mouse liver tumor models. **D.** Quantification of the percentage of PD-1<sup>+</sup> cells as in (C) (\*P<0.05). **E.** Representative IF staining for PD-1 and CD8 in human HCC samples.

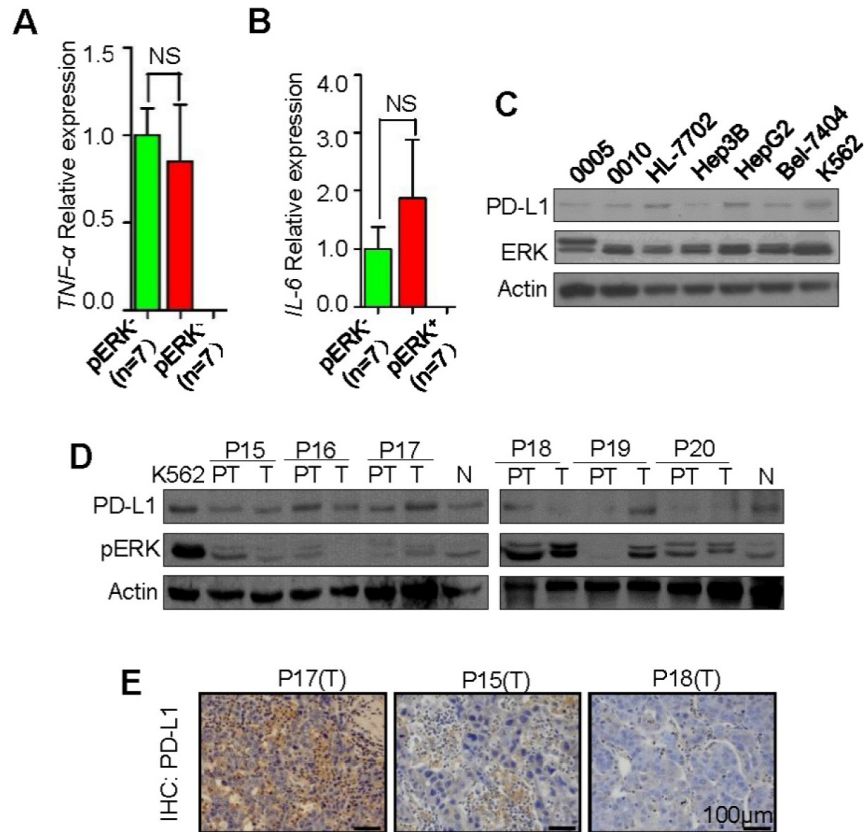

**Supplementary Figure S4: Additional characterization of human liver cancer cell lines and HCC samples.** Real-time PCR analysis for **A.** *TNF  $\alpha$*  and **B.** *IL-6* levels in human tissues. NS, nonsignificant; n=7. **C.** Western blot for PD-L1 in various liver cancer cell lysates. **D.** Western blot for PD-L1 and pERK levels in patient tumor (T) and peritumor (PT) tissues. N, normal liver. **E.** Representative IHC for PD-L1 in HCC sections.

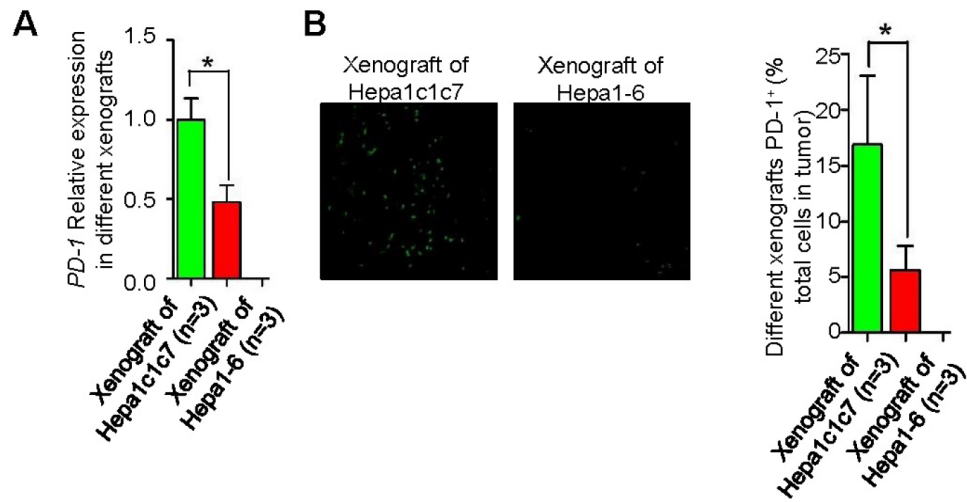

**Supplementary Figure S5: Increased intratumoral PD-1<sup>+</sup> cells in mouse syngeneic liver tumor xenografts.** **A.** Real-time PCR analysis of *PD-1* (\*P<0.05; n=3) mRNA levels in syngeneic xenografts developed from two mouse hepatoma cell lines as indicated. **B.** Representative IF staining for PD-1 in these xenografts (left) and quantification of the percentage of PD-1<sup>+</sup> cells in tumor sections (\*P<0.05; n=3) (right).

**Supplementary Table S1: Sorafenib inhibition IC50 ( $\mu$ M) of liver cancer cell line proliferation at various days of treatment**

| <b>Time</b> | <b>HepG2</b>       | <b>Bel-7404</b>  | <b>Hepa1-6</b>  | <b>Hepa1c1c7</b> |
|-------------|--------------------|------------------|-----------------|------------------|
| Day3        | 1.044              | 5.334            | 4.604           | 6.534            |
| Day4        | 0.892              | 5.378            | 4.781           | 3.693            |
| Day5        | 0.4648             | 5.161            | 2.199           | 5.242            |
| Day6        | 0.4432             | 4.522            | 2.342           | 3.871            |
| <b>Time</b> | <b>HepG2+U0126</b> | <b>SMMC-7721</b> | <b>QGY-7703</b> | <b>HCC-0010</b>  |
| Day3        | 1.212              | 12.4728          | 7.2174          | 5.9941           |
| Day4        | 2.376              | 3.714            | 6.6545          | 2.449            |
| Day5        | 4.543              | 6.595            | 6.0729          | 2.4685           |
| Day6        | /                  | 6.4897           | 5.8599          | 1.6741           |

**Supplementary Table S2: Ratio of tumor weight in the sorafenib-treated arm (T) over the vehicle control arm (C) (T/C ratio)**

| pERK expression | PDX Line | Treatments | Average Tumor Weight (g) | T/C ratio | Group Average |
|-----------------|----------|------------|--------------------------|-----------|---------------|
| Negative Group  | PDX1     | Vehicle    | 3.63                     | 0.79      | 0.98±0.12     |
|                 |          | Sorafenib  | 2.88                     |           |               |
|                 | PDX3     | Vehicle    | 2.17                     | 0.96      |               |
|                 |          | Sorafenib  | 2.09                     |           |               |
|                 | PDX4     | Vehicle    | 2.14                     | 1.19      |               |
|                 |          | Sorafenib  | 2.56                     |           |               |
| Positive Group  | PDX2     | Vehicle    | 1.6                      | 0.23      | 0.24±0.04     |
|                 |          | Sorafenib  | 0.38                     |           |               |
|                 | PDX5     | Vehicle    | 2.03                     | 0.18      |               |
|                 |          | Sorafenib  | 0.37                     |           |               |
|                 | PDX6     | Vehicle    | 1.32                     | 0.32      |               |
|                 |          | Sorafenib  | 0.42                     |           |               |

Three pERK<sup>+</sup> and three pERK<sup>-</sup> PDX models were treated with vehicle control or 30 mg/kg (mpk) (n=5 in each group) and xenograft tumors were removed and weighed at the end of experiments.

**Supplementary Table S3: Differential expression of EMT genes in pERK<sup>+</sup> and pERK<sup>-</sup> xenograft tumors by RNA sequencing**

| Gene Symbol   | Gene Name                                          | Ratio (pERK <sup>+</sup> /pERK <sup>-</sup> tumor) | P value  |
|---------------|----------------------------------------------------|----------------------------------------------------|----------|
| <i>CDH1</i>   | <i>cadherin 1, type 1, E-cadherin (epithelial)</i> | 124:1                                              | 6.36E-06 |
| <i>CLDN1</i>  | <i>claudin 1</i>                                   | 7:1                                                | 0.02     |
| <i>DSP</i>    | <i>desmoplakin</i>                                 | 15:1                                               | 0.0005   |
| <i>KRT8</i>   | <i>keratin 8</i>                                   | 30:1                                               | 0.001    |
| <i>TJP2</i>   | <i>tight junction protein 2 (zona occludens 2)</i> | 11:1                                               | 0.002    |
| <i>TWIST1</i> | <i>twist homolog 1 (Drosophila)</i>                | 1:15                                               | 0.04     |
| <i>CDH12</i>  | <i>cadherin 12, type 2 (N-cadherin 2)</i>          | 1:8                                                | 0.03     |
| <i>TCF4</i>   | <i>transcription factor 4</i>                      | 1:10                                               | 0.001    |
| <i>BMP7</i>   | <i>bone morphogenetic protein 7</i>                | 1:8                                                | 0.03     |



Supplementary Table S4: Patient characterization

| Variables                      | No. of Patients (%) |
|--------------------------------|---------------------|
| <b>No. of patients</b>         | 186 (100)           |
| Age: Median [range], years     | 50.05 [17-80]       |
| <b>Sex</b>                     |                     |
| Men                            | 157 (84.41)         |
| Women                          | 29 (15.59)          |
| <b>HBsAg status</b>            |                     |
| Negative                       | 33 (17.74)          |
| Positive                       | 153 (82.26)         |
| <b>HCV status</b>              |                     |
| Negative                       | 186 (100)           |
| Positive                       | 0 (0)               |
| <b>Cirrhosis</b>               |                     |
| Absent                         | 73 (39.25)          |
| Present                        | 113 (60.75)         |
| ALT: Median [range], U/L       | 37.55, 5-256        |
| <b>Child-Pugh class</b>        |                     |
| A                              | 180 (95.40)         |
| B                              | 6 (4.60)            |
| Tumor size: Median [range], cm | 4.37 [0.80-13.00]   |
| <b>Ascites</b>                 |                     |
| Absent                         | 169 (90.86)         |
| Present                        | 17 (9.14)           |
| <b>Tumor multiplicity</b>      |                     |
| Solitary                       | 175(94.09)          |
| Multiple                       | 11 (5.91)           |
| <b>Vascular invasion</b>       |                     |
| Absent                         | 178 (95.70)         |
| Present                        | 8 (4.30)            |
| <b>Portal vein invasion</b>    |                     |
| Absent                         | 185 (99.46)         |
| Present                        | 1 (0.54)            |
| <b>BCLC stage</b>              |                     |
| 0                              | 26 (13.98)          |
| A                              | 157 (84.41)         |
| B                              | 2 (1.08)            |
| C                              | 1 (0.54)            |
| <b>Micrometastasis</b>         |                     |
| Absent                         | 180 (96.77)         |
| Present                        | 6 (3.23)            |

Abbreviations: ALT, alanine aminotransferase; BCLC, Barcelona Clinic Liver Cancer; HBsAg, hepatitis B surface antigen; HCV, hepatitis C virus.

Supplementary Table S5: Oligonucleotide sequences of primers for quantitative real-time PCR

| Target Gene Name                     | Oligo sequence (5' to 3') | Genomic location |
|--------------------------------------|---------------------------|------------------|
| Human- <i>GAPDH</i>                  | CGACCACTTTGTCAAGCTCA      | sense            |
|                                      | TTACTCCTTGAGGCCATGT       | antisense        |
| Human- <i>TNF<math>\alpha</math></i> | TGGGGTTTGTGAAACTGTGA      | sense            |
|                                      | GTTCTGCACATTCCCTCTC       | antisense        |
| Human- <i>IL6</i>                    | ACTCACCTCTTCAGAACGAATTG   | sense            |
|                                      | CCATCTTTGGAAGGTTTCAGGTTG  | antisense        |
| Human- <i>PD-1</i>                   | ACGAGGGACAATAGGAGCCA      | sense            |
|                                      | GGCATACTCCGTCTGCTCAG      | antisense        |
| Mouse- <i>PD-1</i>                   | GGGCCTAAGCCTATGTCTCC      | sense            |
|                                      | AGGTGTGAAGGAGAGCCAGA      | antisense        |
| Human- <i>PD-L1</i>                  | ATTGCAGCTTCACCAGATAGC     | sense            |
|                                      | AAAGTTGCATTCCAGGGTCAC     | antisense        |
| Human- <i>CDH1</i>                   | ATTTTTCCCTCGACACCCGAT     | sense            |
|                                      | TCCCAGGCGTAGACCAAGA       | antisense        |
| Human- <i>TWIST1</i>                 | GTCCGCAGTCTTACGAGGAG      | sense            |
|                                      | GCTTGAGGGTCTGAATCTTGCT    | antisense        |
| Human- <i>CLDN1</i>                  | TCTGGCTATTTTAGTTGCCACAG   | sense            |
|                                      | AGAGAGCCTGACCAAATTCGT     | antisense        |
| Human- <i>DSP</i>                    | GCAGGATGTAATTTCTCGGC      | sense            |
|                                      | CCTGGATGGTGTCTGTTCT       | antisense        |
| Human- <i>KRT8</i>                   | TGAGGTCAAGGCACAGTACG      | sense            |
|                                      | TGATGTTCCGGTTCATCTCA      | antisense        |
| Human- <i>TJP2</i>                   | GGGAAGGTCGCTGCTATTGT      | sense            |
|                                      | CTCTCGCTGTAGCCACTCC       | antisense        |
| Human- <i>CDH12</i>                  | TTTGATGGAGGTCTCCTAACACC   | sense            |
|                                      | ACGTTTAACACGTTGGAAATGTG   | antisense        |
| Human- <i>TCF4</i>                   | TGCAAAGCCGAATTGAAGATCG    | sense            |
|                                      | AGAAGGTCCAATGATTCCATGC    | antisense        |
| Human- <i>BMP7</i>                   | GGAACGCTTCGACAATGAGAC     | sense            |
|                                      | GCAGGAAGAGATCCGATTCCC     | antisense        |
